# Supplementary material for: Distinct release properties of glutamate/GABA co-transmission serve as a frequency-dependent filtering of supramammillary inputs
Source: eLife. 2024 Dec 16;13:RP99711. doi: 10.7554/eLife.99711 (PMC11649240; doi:10.7554/eLife.99711)
Supplement: Figure 1—figure supplement 1—source data 1. [file elife-99711-fig1-figsupp1-data1.xlsx]

## Sheet: Fig. 1-S1C, D, E
		Fig. S1C	EPSC			Fig. S1D	IPSC			Fig. S1E
			PPR				PPR				PPR
			Bouton	Axon			Bouton	Axon			EPSC	IPSC
			0.366721	0.363352			0.736799	0.760505			0.36335	0.7605
			0.41427	0.452023			0.456403	0.462901			0.45202	0.4629
			0.428681	0.443294			0.544017	0.526769			0.44329	0.52677
			0.498588	0.476038			0.612976	0.602205			0.47604	0.60221
			0.435714	0.311813			0.605187	0.617948			0.31181	0.61795
			0.541838	0.581938			0.545209	0.598488			0.58194	0.59849
		mean	0.447635	0.438076		mean	0.583432	0.594803		mean	0.438075	0.594803
		sem	0.0255813	0.0382471		sem	0.0383051	0.0408607		sem	0.0382478	0.0408602
		n	6	6		n	6	6		n	6	6

## Sheet: Fig. 1-S1F
			EPSC				IPSC
			Latency (ms)				Latency (ms)
			Bouton	Axon			Bouton	Axon
			2.1	3.7			2.46667	4.26667
			2.33333	3.88333			2.55	3.56
			1.85	4.63333			1.93333	3.18333
			1.85	3.86667			2.66667	4.04444
			2.4	3.9375			1.8375	3.1375
			1.7375	3.225			2.18571	3.81429
			1.82857	3.54286		mean	2.27331	3.6677
		mean	2.0142	3.82696		sem	0.139268	0.187039
		sem	0.100356	0.163765		n	6	6
		n	7	7
