# Supplementary material for: Distinct release properties of glutamate/GABA co-transmission serve as a frequency-dependent filtering of supramammillary inputs
Source: eLife. 2024 Dec 16;13:RP99711. doi: 10.7554/eLife.99711 (PMC11649240; doi:10.7554/eLife.99711)
Supplement: Figure 1—figure supplement 2—source data 1. [file elife-99711-fig1-figsupp2-data1.xlsx]

## Sheet: Fig. 1-S2
					FV amplitude (mV)
					1st	2nd
					47.314	46.127
					136.46	143
					91.549	89.573
					81.735	75.284
					63.3	79.8
					78.366	68.7
					42.138	41
				mean	77.266	77.6406
				sem	12.0072	12.7616
				n	7	7
