# Supplementary material for: Distinct release properties of glutamate/GABA co-transmission serve as a frequency-dependent filtering of supramammillary inputs
Source: eLife. 2024 Dec 16;13:RP99711. doi: 10.7554/eLife.99711 (PMC11649240; doi:10.7554/eLife.99711)
Supplement: Figure 1—source data 1. [file elife-99711-fig1-data1.xlsx]

## Sheet: Fig. 1E
							Proportion (%)
			Total boutons				Both	VGluT2	VIAAT
			646				94.8388	1.57843	0
			599				95.6844	2.83569	0
			193				96.3731	3.10881	0
			204				95.5882	3.43137	0
			215				95.3488	2.7907	0
			115				93.913	2.6087	0
			233				94.8498	2.57511	0
		total	2205			meaｎ	95.228	2.70411	0
		n	7			sem	0.296304	0.218785	0

## Sheet: Fig. 1G
				PPR
				EPSC	IPSC
				0.359461	0.475458
				0.375527	0.609781
				0.452244	0.546043
				0.41362	0.650927
				0.475962	0.533099
				0.572776	0.596944
				0.507755	0.632894
				0.557416	0.730175
			mean	0.464345	0.596915
			sem	0.0280458	0.0278862

## Sheet: Fig. 1H
			EPSC amplitude (pA)					IPSC amplitude (pA)
			[Ca2+]o 2.5mM	[Ca2+]o 1mM				[Ca2+]o 2.5mM	[Ca2+]o 1mM
			23.4191	15.1087				27.099	12.3102
			40.6349	24.383				29.8498	14.6117
			16.6827	10.7744				71.9686	23.3696
			35.5784	11.5593				33.6554	13.0176
			19.0011	12.5132				50.7965	19.7997
			31.6807	13.1991				36.952	13.4136
			58.0011	31.2535				39.8327	25.1733
			45.154	18.0389				16.7053	4.45102
			78.8098	30.3705				71.146	20.8028
			66.1972	25.5724				51.4731	16.8606
			57.4939	28.283				27.3329	19.5005
			17.0489	10.673				33.9897	14.1088
			49.3373	35.7524				44.7635	18.6755
			17.5002	14.6828				59.4344	25.7035
		n	14	14				32.2945	12.4089
							n	15	15

## Sheet: Fig. 1I
			Reduction (%)
			EPSC	IPSC
			35.4857	54.5731
			39.9948	50.4263
			35.4158	67.5281
			67.5105	61.321
			34.1445	61.0216
			58.3371	63.6999
			46.1157	36.8023
			60.0504	73.3556
			61.4635	70.679
			61.3694	41.1014
			50.807	67.1858
			37.3978	57.9107
			27.5347	58.2796
			16.0996	48.007
				61.5759
		mean	45.1233	58.2312
		sem	4.06554	2.70828
		n	14	15
