# Supplementary material for: Distinct release properties of glutamate/GABA co-transmission serve as a frequency-dependent filtering of supramammillary inputs
Source: eLife. 2024 Dec 16;13:RP99711. doi: 10.7554/eLife.99711 (PMC11649240; doi:10.7554/eLife.99711)
Supplement: Figure 2—figure supplement 1—source data 1. [file elife-99711-fig2-figsupp1-data1.xlsx]

## Sheet: Fig. 2-S1
			EPSP slope (%)
		Time (min)	1	2	3	4	5	mean	sem
		1	104.302	99.2463	103.895	94.0428	101.839	100.665	1.88285
		2	100.373	106.971	99.68	95.3283	96.5173	99.774	2.03151
		3	103.762	103.498	100.2	106.086	97.5934	102.228	1.49059
		4	98.2126	94.0962	103.68	108.183	96.7717	100.189	2.53772
		5	98.5071	101.996	96.779	103.853	91.939	98.6148	2.08348
		6	102.583	103.028	100.435	103.853	107.787	103.537	1.20328
		7	99.2929	99.9973	99.7971	90.3217	105.341	98.9501	2.42105
		8	99.6366	102.72	101.358	97.5948	100.352	100.332	0.85823
		9	94.9715	96.8322	97.2539	105.139	97.3978	98.3188	1.75934
		10	98.3598	91.615	96.9221	95.5989	104.461	97.3914	2.09423
		11	100.275	74.5554	93.013	93.806	107.102	93.7503	5.43065
		12	93.4983	64.3357	93.5268	95.8019	104.539	90.3404	6.81104
		13	92.5162	46.3775	93.6374	104.563	99.9217	87.4033	10.4864
		14	88.8332	32.2416	91.8812	104.327	105.968	84.65	13.5241
		15	83.7262	26.2734	91.2047	94.5841	95.8912	78.3359	13.1859
		16	69.9273	22.6791	89.8063	88.2582	92.3107	72.5963	13.0939
		17	59.4186	12.3253	82.736	84.1311	78.693	63.4608	13.5314
		18	66.9318	14.7931	72.1599	71.9529	71.0233	59.3722	11.1848
		19	66.9318	14.6858	63.2358	63.9694	65.0753	54.7796	10.0428
		20	61.6284	10.8366	60.2048	54.0577	56.1925	48.584	9.53392
		21	58.0927	5.90112	49.7002	56.8655	57.2295	45.5578	10.0275
		22	57.5035	11.4804	51.1506	57.8803	59.91	47.5849	9.14476
		23	60.1061	9.5491	44.8023	53.0767	47.9945	43.1057	8.77855
		24	62.5614	5.69994	47.1569	54.1592	57.836	45.4827	10.2592
		25	48.075	3.70161	48.5815	51.2161	51.3402	40.5829	9.24425
