# Supplementary material for: Distinct release properties of glutamate/GABA co-transmission serve as a frequency-dependent filtering of supramammillary inputs
Source: eLife. 2024 Dec 16;13:RP99711. doi: 10.7554/eLife.99711 (PMC11649240; doi:10.7554/eLife.99711)
Supplement: Figure 2—source data 1. [file elife-99711-fig2-data1.xlsx]

## Sheet: Fig. 2A
				EPSC					IPSC
			Time (min)	Amplitude (%)	sem			Time (min)	Amplitude (%)	sem
			1	102.801	2.42619			1	96.4178	4.1336
			2	100.883	1.30348			2	93.7439	4.0992
			3	102.824	1.63323			3	101.748	4.87335
			4	98.9292	3.15171			4	94.9915	3.31978
			5	98.4546	2.00697			5	99.8633	5.18735
			6	94.6327	3.88986			6	103.831	3.13195
			7	100.772	5.37913			7	98.9653	5.88255
			8	103.32	4.75566			8	98.1631	2.816
			9	99.9455	4.08498			9	104.704	6.04714
			10	96.4511	3.48602			10	109.424	3.24325
			11	101.858	4.5995			11	118.442	11.3935
			12	95.786	6.95616			12	108.481	8.7598
			13	96.1517	6.44081			13	111.742	8.53713
			14	99.131	5.74113			14	100.155	9.71659
			15	98.6934	5.86545			15	107.244	8.56916
			16	87.5971	4.9776			16	103.188	8.83846
			17	84.7522	4.00516			17	88.3237	3.86904
			18	84.9036	6.7628			18	97.4453	7.97496
			19	90.5893	6.47854			19	96.7991	8.51923
			20	81.5395	4.06553			20	100.761	10.1456
			21	90.1646	9.82444			21	102.001	10.0025
			22	92.0687	10.6959			22	97.5067	10.424
			23	87.4449	6.747			23	103.874	7.97164
			24	90.257	6.55633			24	96.6526	5.57624
			25	87.8645	8.07644			25	82.6106	4.1407
			26	87.9766	11.1803			26	102.096	11.9726
			27	97.9351	10.9555			27	102.374	8.05097
			28	96.8197	13.1969			28	106.033	11.5915
			29	90.9547	19.8044			29	91.5018	11.0196
			30	88.65	13.6397			30	106.35	12.5317

## Sheet: Fig. 2B
				EPSC					IPSC
			Time (min)	Amplitude (%)	sem			Time (min)	Amplitude (%)	sem
			1	101.818	3.25674			1	113.255	4.46347
			2	95.2821	1.48127			2	99.5109	7.35958
			3	95.3147	3.40639			3	102.993	3.89439
			4	98.7239	4.15017			4	97.8198	5.48091
			5	103.244	1.75185			5	102.931	3.16902
			6	101.821	4.47168			6	90.3617	3.77574
			7	101.049	3.02479			7	96.1502	2.3735
			8	100.291	6.84319			8	100.124	4.8075
			9	100.406	5.76075			9	93.7004	6.65901
			10	102.051	5.99976			10	95.9537	4.72569
			11	102.233	5.01426			11	89.0537	6.31176
			12	96.9948	7.51222			12	98.7301	7.79732
			13	102.73	8.30949			13	98.8525	4.85739
			14	85.4022	8.02158			14	95.8751	8.11265
			15	68.656	15.6512			15	86.3291	6.69315
			16	56.1186	13.1612			16	65.0814	5.54917
			17	49.0184	10.4536			17	50.9941	4.18436
			18	41.245	12.1134			18	39.484	4.07042
			19	29.8221	7.78233			19	33.3641	4.3514
			20	31.4124	6.92018			20	30.4531	2.80637
			21	23.2265	4.13203			21	25.9135	2.91132
			22	20.5305	3.89669			22	22.6667	0.9124
			23	25.6931	7.82537			23	26.5569	3.21362
			24	22.1597	4.27618			24	21.8352	1.91382
			25	25.2847	4.73763			25	26.0532	3.11705
			26	23.7914	4.99089			26	24.0784	2.40505
			27	23.2147	3.97678			27	25.3039	1.95158
			28	25.9345	5.50108			28	24.4407	2.08011
			29	23.0628	4.11458			29	22.2921	1.58084
			30	21.4197	4.22314			30	23.4493	1.72962

## Sheet: Fig. 2C
				Inhibition (%)		sem
			DCG-IV (mM)	EPSC	IPSC	EPSC	IPSC
			0.01	-2.32852	0.17928	4.58313	6.08153
			0.1	29.0013	11.8815	5.94752	5.33385
			0.5	58.9258	47.0562	4.03818	4.45742
			1	64.4446	57.948	3.80995	4.7564

## Sheet: Fig. 2D
			Inhibition (%)
			EPSC	IPSC
			45.1884	21.0024
			39.746	38.5116
			52.8831	30.1828
			58.3593	39.8978
			53.7068	32.3535
			49.6472	50.9289
			59.9671	59.9922
			53.5331	35.9134
		Mean	51.6289	38.5978
		sem	2.35642	4.30549
		n	8	8

## Sheet: Fig. 2E
			BAPTA-AM										EGTA-AM
				EPSC				IPSC						EPSC				IPSC
			Time (min)	Amplitude (%)	sem		Time (min)	Amplitude (%)	sem				Time (min)	Amplitude (%)	sem		Time (min)	Amplitude (%)	sem
			1	95.4657	5.77045		1	100.225	4.67188				1	99.4661	1.28954		1	94.2986	5.77571
			2	97.1135	2.96158		2	104.062	4.90825				2	98.7102	4.58981		2	97.405	5.46934
			3	98.7744	4.77375		3	98.9966	4.60611				3	96.4928	1.54574		3	106.18	7.73147
			4	99.2574	4.06222		4	91.7658	3.47816				4	99.808	4.77043		4	94.8797	4.37691
			5	102.698	3.0518		5	101.04	5.67216				5	101.536	3.27793		5	102.538	5.31582
			6	100.436	3.79638		6	99.5054	4.5865				6	103.126	2.98174		6	107.913	4.19472
			7	104.843	4.17811		7	101.054	4.85899				7	98.6018	3.87314		7	100.964	7.09143
			8	102.311	1.83256		8	110.523	5.07433				8	98.5358	4.55154		8	96.9252	5.5925
			9	93.9661	4.47994		9	93.7095	2.53636				9	97.935	3.01248		9	95.7953	5.04612
			10	105.134	3.5031		10	97.1877	5.23259				10	105.788	2.3317		10	104.6	7.67864
			11	102.489	5.3651		11	88.6297	3.57917				11	100.2	5.37149		11	105.075	8.79943
			12	99.8305	8.88006		12	92.5561	3.50202				12	98.9941	1.99927		12	103.323	7.52624
			13	99.3809	4.49253		13	90.4374	3.80005				13	97.8898	5.82104		13	109.852	7.17163
			14	95.1385	3.9471		14	86.5994	4.40017				14	107.77	7.72001		14	108.57	9.19482
			15	90.5541	9.91409		15	79.9995	5.2395				15	104.951	7.41719		15	111.711	7.75497
			16	89.7382	6.15852		16	92.9718	9.15251				16	95.2444	3.86542		16	106.281	9.59038
			17	92.8499	6.22893		17	70.4822	4.38664				17	91.956	7.4067		17	104.681	9.98113
			18	83.0533	8.96966		18	70.3802	5.17009				18	90.5593	3.72059		18	105.322	8.30234
			19	84.6807	7.77064		19	65.7357	6.78408				19	95.6588	7.70894		19	105.382	8.46506
			20	84.2353	8.12853		20	70.2935	5.9034				20	88.7511	6.51709		20	95.8496	9.20454
			21	83.7652	10.2873		21	70.1643	6.59653				21	90.5255	5.92433		21	100.595	7.16061
			22	79.5766	10.2691		22	72.5641	6.90442				22	88.275	7.01411		22	99.9721	8.81997
			23	77.6809	9.7831		23	68.2473	9.96984				23	88.468	7.08484		23	89.8191	6.2513
			24	74.7786	10.0983		24	63.9838	7.0634				24	85.4209	8.26154		24	99.9725	7.0271
			25	73.0101	7.90803		25	63.5352	8.83748				25	74.9561	4.82792		25	96.7296	6.59789
			26	74.9852	9.85749		26	65.4499	8.61435				26	76.8094	5.36141		26	100.817	8.42597
			27	76.5268	9.62301		27	72.5539	11.3023				27	74.0876	4.67104		27	98.4407	9.72645
			28	70.0525	8.94976		28	65.8011	9.03396				28	81.4394	3.8453		28	99.1629	5.26804
			29	61.0085	9.98693		29	69.9959	12.578				29	76.3793	6.83052		29	92.418	8.85702
			30	68.762	10.0651		30	66.8632	10.2637				30	70.4878	6.31151		30	104.435	8.50538
			31	66.9299	9.00374		31	63.1651	9.58686				31	66.2449	4.58205		31	87.8454	8.07924
			32	67.8705	10.344		32	58.5447	6.36614				32	70.7481	10.4792		32	96.7245	10.5681
			33	65.9373	13.4438		33	60.6339	9.38183				33	70.2316	8.84936		33	95.7705	7.44682
			34	55.6441	10.6179		34	60.461	7.28688				34	69.4011	5.53728		34	99.3131	9.23503
			35	65.9095	10.8157		35	75.4732	6.32054				35	60.4551	8.49416		35	87.6286	6.96513
			36	58.1793	8.89231		36	58.6519	5.66094				36	68.4233	7.51773		36	91.8795	9.56968
			37	66.7692	11.1952		37	61.4189	9.52714				37	66.6252	9.64126		37	87.8582	9.17665
			38	66.1852	13.3207		38	61.0737	6.25332				38	69.7686	5.89662		38	94.1667	13.6836
			39	61.8905	13.4999		39	65.2984	9.18358				39	67.1766	4.14964		39	92.3722	5.26954
			40	58.5806	14.2309		40	68.8624	8.50521				40	64.117	6.41199		40	97.2463	11.5236
