# Supplementary material for: Distinct release properties of glutamate/GABA co-transmission serve as a frequency-dependent filtering of supramammillary inputs
Source: eLife. 2024 Dec 16;13:RP99711. doi: 10.7554/eLife.99711 (PMC11649240; doi:10.7554/eLife.99711)
Supplement: Figure 3—figure supplement 2—source data 1. [file elife-99711-fig3-figsupp2-data1.xlsx]

## Sheet: Fig. 3-S2B
			EPSC amplitude (pA)				IPSC amplitude (pA)
			Before	PTX			Before	NBQX
			8.48016	8.65504			12.8932	12.9057
			8.21165	9.81919			9.7335	9.13187
			7.90592	6.16064			9.56246	8.18288
			5.15358	5.12061			9.20678	8.3132
			6.17822	7.32297			10.9143	11.256
		mean	7.18591	7.41569		mean	10.462	9.95792
		sem	0.647744	0.841544		sem	0.671966	0.919577
		n	5	5		n	5	5

## Sheet: Fig.3-S2C
				tau (ms)				Rise time (ms)
				Before	PTX			Before	NBQX
				3.86279	3.92003			3.85	4.1
				2.67315	2.5035			3	2
				4.50836	4.8398			6.9	8.05
				3.09895	3.08109			7.8	7.45
				3.4528	3.34818			4.85	6
			mean	3.51921	3.53852		mean	5.28	5.52
			sem	0.315699	0.397216		sem	0.905621	1.11272
			n	5	5		n	5	5
