# Supplementary material for: Distinct release properties of glutamate/GABA co-transmission serve as a frequency-dependent filtering of supramammillary inputs
Source: eLife. 2024 Dec 16;13:RP99711. doi: 10.7554/eLife.99711 (PMC11649240; doi:10.7554/eLife.99711)
Supplement: Figure 3—source data 1. [file elife-99711-fig3-data1.xlsx]

## Sheet: Fig. 3B
		Amplitude (pA)
						Biphasic				Inset
		EPSC		IPSC		EPSC	IPSC			Trial	Amplitude (pA)
		6.7388		6.8611		7.4087	5.1973			1	-1.0379
		4.0862		7.4972		8.2453	4.9043			2	0.22589
		6.0427		9.822		6.2772	5.305			3	-1.0806
		7.8796		4.6372		5.6054	4.7416			4	-1.452
		6.569		8.821		5.9312	5.2029			5	0.39023
		5.4182		7.0714		4.6095	4.5647			6	-0.95763
		7.9904		5.2953		4.3163	3.7731			7	1.1521
		6.3055		5.5588		5.7855	9.8799			8	1.306
		9.2617		3.6883		7.4015	15.305			9	2.0476
		8.9234		4.8292		5.8997	7.9213			10	6.0652
		7.3177		4.5911		5.0125	7.4593			11	-1.2847
		4.5439		5.0892		5.4405	8.6006			12	-0.28579
		4.5238		7.2479		4.1221	4.3855			13	-7.5129
		9.8964		6.7153		4.2699	5.3534			14	-0.18375
		6.2428		5.1816		5.4978	3.7796			15	0.753
		3.8053		4.5144		5.8747	6.7755			16	1.0595
		4.6507		7.7724		4.7018	10.338			17	0.45518
		7.5024		6.5672		5.8288	5.1432			18	-0.43565
		5.4063		12.509		3.6821	5.1912			19	0.16093
		6.7588		7.6632						20	0.67134
		6.8336		23.655						21	-1
		5.4021		8.4337						22	-0.57934
		5.2914		6.7295						23	-5.7101
		7.2633		5.8553						24	-0.26588
		6.4695		3.2011						25	1.0932
		10.795		5.5342						26	-0.81824
		8.0883		6.3181						27	0.03427
		8.4557		6.0652						28	-0.879
		9.2063		6.678						29	-0.726
		8.7107		6.1722						30	-0.384
		6.4809		7.9741						31	0.81028
		5.7563		5.3436						32	-0.53872
		5.1144		8.2701						33	0.28017
		7.9921		9.6166						34	0.51726
		3.8969		8.1013						35	-0.88174
		6.4037		8.3313						36	1.407
		5.9685		7.8603						37	1.3896
		8.4458		4.0213						38	0.66154
		6.0933		3.5511						39	-1.05
		7.6293		2.5331						40	-0.98503
		7.0783		4.7661						41	-0.76652
		6.7064		5.9765						42	1.2917
		7.5129		5.3581						43	-0.5569
		5.7101		4.2789						44	-7.7683
		7.7683		9.9422						45	-0.88644
		5.6029		7.12						46	-0.42671
		3.8769		4.993						47	-5.6029
		5.7961		5.1394						48	-0.45934
		4.8133		5.1338						49	-0.3521
		5.3502		6.1847						50	6.678
		7.9846		7.5963						51	1.6544
		6.2731		6.5605						52	1.7538
		4.6478		9.2717						53	0.98767
		4.9483		5.5925						54	-0.251
		4.0034		7.3022						55	-1.1731
		4.1612		4.954						56	-0.71182
		4.3341		5.2213						57	-1.5636
		15.406		4.7914						58	0.94519
		5.112		4.3224						59	-1.601
		5.4643		9.8808						60	-2.0448
		7.6917		8.692						61	0.3656
		7.0929		6.8631						62	1.4816
		5.5321		6.7536						63	-1.832
		7.8623		4.949						64	-1.4484
		7.0201		7.4563						65	-0.99989
		7.3456		8.6974						66	-0.87324
		7.3631		4.116						67	6.1722
		6.3889								68	-1.3676
		6.7774								69	0.16541
		5.8288								70	0.68
		6.4037								71	2.0539
		6.1611								72	0.12618
		8.8923								73	0.09758
		7.3579								74	-0.8066
		5.2781								75	-0.55818
		5.3955								76	7.9741
		8.1448								77	0.448
		5.1933								78	-1.6223
		5.1205								79	0.2229
		4.8203								80	-1.271
		6.3131								81	-1.0858
		4.4318								82	0.0404
		4.496								83	-0.69403
		5.5116								84	-0.1732
		6.0256								85	1.1547
		4.6648								86	-0.6632
										87	-0.5716
										88	-0.62566
										89	0.56142
										90	0.4062
										91	0.7821
										92	2.5217
										93	-0.863
										94	0.7071
										95	0.1448
										96	2.1704
										97	-3.8769
										98	-1.1506
										99	-0.2705
										100	1.086

## Sheet: Fig. 3C
				EPSC			IPSC
				Amplitude	events		Amplitude	events
				1	0		1	0
				2	0		2	0
				3	0		3	1
				4	3		4	3
				5	14		5	13
				6	20		6	13
				7	19		7	12
				8	18		8	11
				9	7		9	7
				10	3		10	5
				11	1		11	0
				12	0		12	0
				13	0		13	1
				14	0		14	0
				15	0		15	0
				16	1		16	0
				17	0		17	0
							18	0
							19	0
							20	0
							21	0
							22	0
							23	0
							24	1
							25	0

## Sheet: Fig. 3D
						% of PSCs
						EPSC	IPSC	Biphasic
						8	4	2
						3	2	1
						4	2	2
						3	4	0
						4	5	1
						8	1	0
						7	5	3
						5	4	1
						5	4	0
						5	6	3
						5	3	0
						4	2	0
						10	2	2
						6	4	1
						2	6	2
						5	5	1
						2	8	0
					mean	5.05882	3.94118	1.11765
					sem	0.531857	0.441176	0.255561
					events	86	67	19

## Sheet: Fig. 3F
			Total number of events					Number of events
			EPSC	IPSC	Biphasic			EPSC	IPSC	Biphasic
			15	14	0			15	14	0
			6	23	4			6	23	4
			43	22	4			43	22	4
			22	23	2			22	23	2
			53	1	0			53	1	0
			42	8	2			42	8	2
			25	16	2			25	16	2
			18	32	4			18	32	4
			17	33	5			17	33	5
			47	34	3			47	34	3
			19	51	2			19	51	2
		Total	307	257	28		mean	27.9091	23.3636	2.54545
		n	11	11	11		sem	4.67771	4.18281	0.492925
							n	11	11	11

## Sheet: Fig. 3G
			EPSC					IPSC
			Amplitude (pA)	Minimal stim	Strontium			Amplitude (pA)	Minimal stim	Strontium
			0	0	0			0	0	0
			1	0	0			1	0	0
			2	0	0			2	0.01667	0.00391
			3	0.0241	0.05212			3	0.06667	0.05859
			4	0.19277	0.16612			4	0.25	0.16406
			5	0.43373	0.49186			5	0.45	0.38672
			6	0.66265	0.68404			6	0.63333	0.61328
			7	0.87952	0.80782			7	0.8	0.76563
			8	0.93976	0.87622			8	0.9	0.85938
			9	0.9759	0.94137			9	0.96667	0.9375
			10	0.98795	0.98697			10	0.96667	0.97266
			11	0.98795	0.98697			11	0.96667	0.97656
			12	0.98795	0.99674			12	0.98333	0.98047
			13	0.98795	1			13	0.98333	0.98438
			14	0.98795	1			14	0.98333	0.99609
			15	1	1			15	0.98333	0.99609
			16	1	1			16	0.98333	1
			17	1	1			17	0.98333	1
			18	1	1			18	0.98333	1
			19	1	1			19	0.98333	1
			20	1	1			20	0.98333	1
								21	0.98333	1
								22	0.98333	1
								23	1	1
								24	1	1
								25	1	1
