# Supplementary material for: Distinct release properties of glutamate/GABA co-transmission serve as a frequency-dependent filtering of supramammillary inputs
Source: eLife. 2024 Dec 16;13:RP99711. doi: 10.7554/eLife.99711 (PMC11649240; doi:10.7554/eLife.99711)
Supplement: Figure 4—source data 1. [file elife-99711-fig4-data1.xlsx]

## Sheet: Fig. 4I
#1	Region Label	Distance		distance	#	each bin	cumulative
1	Line1	329.707		0-100	1	0.414938	0
1	Line2	485.197		100-200	11	4.56432	4.97925
1	Line3	376.752		200-300	48	19.917	24.8963
1	Line4	189.749		300-400	70	29.0456	53.9419
1	Line5	588.388		400-500	61	25.3112	79.2531
1	Line6	216.987		500-600	31	12.8631	92.1162
1	Line7	131.568		600-700	12	4.97925	97.0954
1	Line8	210.508		700-	7	2.90456	100
1	Line9	117.678		total	241
1	Line10	320.118
1	Line11	421.016
1	Line12	74.4259
1	Line13	520.981
1	Line14	289.449
1	Line15	294.194
1	Line16	210.508
1	Line17	260.49
1	Line18	279.716
1	Line19	695.195
1	Line20	353.033
1	Line21	289.449
1	Line22	376.752
1	Line23	485.197
#2	Line1	274.721
1	Line2	466.277
1	Line3	306.866
1	Line4	483.768
1	Line5	421.016
1	Line6	526.27
1	Line7	353.033
1	Line8	433.974
1	Line9	485.197
1	Line10	518.984
1	Line11	200.398
1	Line12	263.135
1	Line13	325.48
1	Line14	402.519
1	Line15	336.977
1	Line16	315.762
1	Line17	325.48
1	Line18	383.131
1	Line19	191.565
1	Line20	633.713
1	Line21	431.574
1	Line22	191.565
1	Line23	294.194
1	Line24	411.872
1	Line25	494.386
1	Line26	441.095
1	Line27	263.135
1	Line28	398.196
1	Line29	510.916
1	Line30	306.866
1	Line31	435.566
1	Line32	210.508
1	Line33	205.515
1	Line34	332.843
1	Line35	372.129
1	Line36	379.499
#3	Line1	357.902
1	Line2	274.721
1	Line3	542.467
1	Line4	294.194
1	Line5	365.559
1	Line6	588.388
1	Line7	398.196
1	Line8	502.719
1	Line9	480.177
1	Line10	300.02
1	Line11	294.194
1	Line12	679.072
#4	Line1	505.466
1	Line2	588.388
1	Line3	400.795
1	Line4	131.568
1	Line5	424.293
1	Line6	506.151
1	Line7	248.241
1	Line8	402.519
1	Line9	216.987
1	Line10	249.632
1	Line11	166.421
1	Line12	316.857
1	Line13	307.992
1	Line14	425.108
1	Line15	425.108
1	Line16	336.977
1	Line17	524.293
1	Line18	394.703
1	Line19	779.253
1	Line20	351.066
1	Line21	391.178
1	Line22	773.904
1	Line23	336.977
1	Line24	263.135
1	Line25	428.353
1	Line26	351.066
1	Line27	391.178
1	Line28	424.293
1	Line29	526.27
1	Line30	300.02
1	Line31	505.466
1	Line32	485.197
1	Line33	520.981
1	Line34	321.197
1	Line35	297.703
1	Line36	640.235
1	Line37	342.076
1	Line38	425.108
#5	Line1	474.374
1	Line2	263.135
1	Line3	346.1
1	Line4	248.241
1	Line5	450.415
1	Line6	249.632
1	Line7	465.534
1	Line8	578.897
1	Line9	588.388
1	Line10	342.076
1	Line11	424.293
1	Line12	452.715
1	Line13	379.499
1	Line14	376.752
1	Line15	657.838
1	Line16	332.843
1	Line17	283.405
#6	Line1	342.076
1	Line2	474.374
1	Line3	424.293
1	Line4	416.053
1	Line5	294.194
1	Line6	300.02
1	Line7	346.1
1	Line8	300.02
1	Line9	748.433
1	Line10	289.449
1	Line11	473.643
1	Line12	394.703
1	Line13	357.902
1	Line14	474.374
1	Line15	502.719
1	Line16	496.482
1	Line17	289.449
1	Line18	373.985
1	Line19	474.374
1	Line20	268.346
1	Line21	424.293
1	Line22	470.71
1	Line23	518.316
1	Line24	336.977
1	Line25	226.357
1	Line26	325.48
1	Line27	485.197
1	Line28	270.914
1	Line29	549.442
1	Line30	184.195
1	Line31	353.033
1	Line32	357.902
1	Line33	474.374
1	Line34	605.783
1	Line35	242.599
1	Line36	431.574
1	Line37	388.514
1	Line38	411.03
1	Line39	376.752
1	Line40	131.568
1	Line41	357.902
#7	Line1	372.129
1	Line2	450.415
1	Line3	189.749
1	Line4	450.415
1	Line5	249.632
1	Line6	450.415
1	Line7	401.658
1	Line8	315.762
1	Line9	549.442
1	Line10	400.795
1	Line11	353.033
1	Line12	223.278
1	Line13	307.992
1	Line14	584.255
1	Line15	447.33
1	Line16	223.278
1	Line17	270.914
1	Line18	506.151
1	Line19	365.559
1	Line20	366.505
1	Line21	279.716
1	Line22	411.03
1	Line23	579.495
#8	Line1	625.465
1	Line2	248.241
1	Line3	480.177
1	Line4	283.405
1	Line5	294.194
1	Line6	332.843
1	Line7	532.808
1	Line8	351.066
1	Line9	600.04
1	Line10	242.599
1	Line11	270.914
1	Line12	411.03
1	Line13	317.947
1	Line14	224.823
1	Line15	300.02
1	Line16	279.716
#9	Line1	448.103
1	Line2	474.374
1	Line3	785.008
1	Line4	329.707
1	Line5	781.028
1	Line6	817.415
1	Line7	506.151
1	Line8	289.449
1	Line9	368.389
1	Line10	450.415
1	Line11	189.749
1	Line12	329.707
1	Line13	694.697
1	Line14	600.04
1	Line15	394.703
1	Line16	542.467
1	Line17	499.264
1	Line18	373.985
1	Line19	379.499
1	Line20	428.353
1	Line21	559.433
1	Line22	317.947
1	Line23	447.33
1	Line24	470.71
1	Line25	502.719
1	Line26	505.466
1	Line27	605.783
1	Line28	542.467
1	Line29	708.513
1	Line30	468.499
1	Line31	491.577
1	Line32	336.977
1	Line33	274.721
1	Line34	449.645
1	Line35	659.94
		241
		8.74955

## Sheet: Fig. 4J
	NR1+GABAAa1+	only GABAAa1+	only NR1+
#1	35	11	16
#2	40	10	21
#3	26	3	20
#4	63	15	23
#5	23	13	17
#6	41	21	5
#7	33	26	16
#8	31	18	35
#9	41	23	8
total	333	140	161	634
%	52.5237	22.082	25.3943
