# Supplementary material for: Distinct release properties of glutamate/GABA co-transmission serve as a frequency-dependent filtering of supramammillary inputs
Source: eLife. 2024 Dec 16;13:RP99711. doi: 10.7554/eLife.99711 (PMC11649240; doi:10.7554/eLife.99711)
Supplement: Figure 5—figure supplement 1—source data 1. [file elife-99711-fig5-figsupp1-data1.xlsx]

## Sheet: Fig. 5-S1
	EPSCn/EPSC1
		Stim #	E1-1	E2-2	E3-3	E4-4	E5-5	E6-6	E7-7	E8-8	mean	sem
		1	100	100	100	100	100	100	100	100	100	0
		2	19.9845	44.1771	16.5522	20.6268	25.5135	38.0515	37.807	33.9275	29.58	3.6103
		3	16.0506	28.1717	16.5032	13.4473	15.5676	32.5736	22.9494	18.6889	20.494	2.40441
		4	15.2314	16.2345	11.6678	12.7066	16.2162	28.4652	20.9095	18.3439	17.4719	1.88013
		5	13.5967	14.8021	9.74071	10.9971	14.973	22.4005	27.1993	15.2962	16.1257	2.06688
		6	12.8369	13.6084	15.3118	9.40171	11.8919	19.2703	38.1641	13.5135	16.7498	3.21891
		7	14.9974	16.521	14.2607	11.1681	12.4324	29.3456	26.7743	20.2013	18.2126	2.36437
		8	12.7649	15.9003	11.1423	9.74359	16.0541	30.7151	19.3795	16.2737	16.4967	2.31175
		9	11.5946	17.0463	12.3336	11.2251	15.4811	27.7805	16.4046	14.2611	15.7659	1.88293
		10	11.2345	15.1363	12.6139	10.057	17.2973	25.2372	24.5644	18.1714	16.789	2.02808
	IPSCn/IPSC1
		Stim #	E1-1	E2-2	E3-3	E4-4	E5-5	E6-6	E7-7	E8-8	mean	sem
		1	100	100	100	100	100	100	100	100	100	0
		2	29.1437	37.6696	30.7151	26.3238	27.1502	31.6	53.9886	50	35.8239	3.75208
		3	21.0688	24.5437	20.3986	16.8187	26.2958	34.8	39.6951	46.4286	28.7562	3.69301
		4	21.2177	23.6313	23.3294	19.8767	22.0239	28.9333	35.5023	50.625	28.1425	3.67784
		5	20.6745	19.8877	21.4537	18.6025	24.1124	32.1333	37.8982	40.6339	26.9245	3.07981
		6	20.2365	20.4726	19.9883	18.0929	29.5235	26.6667	33.2154	33.0357	25.1539	2.20036
		7	21.0031	19.1858	21.8054	17.7871	28.4792	33.3333	36.5913	30.9821	26.1459	2.51141
		8	20.587	16.6121	19.7773	17.1245	25.2516	30.2667	37.8437	35	25.3078	2.90054
		9	21.2002	15.9101	19.9297	19.2141	32.5612	36.7067	37.9635	36.6071	27.5116	3.28085
		10	19.5357	16.3781	17.9191	20.0296	23.7327	28	31.6907	33.6875	23.8717	2.31339
