# Supplementary material for: Distinct release properties of glutamate/GABA co-transmission serve as a frequency-dependent filtering of supramammillary inputs
Source: eLife. 2024 Dec 16;13:RP99711. doi: 10.7554/eLife.99711 (PMC11649240; doi:10.7554/eLife.99711)
Supplement: Figure 5—figure supplement 2—source data 1. [file elife-99711-fig5-figsupp2-data1.xlsx]

## Sheet: Fig. 5-S2
			Fiber volley amplitude (%)									Fiber volley amplitude (%)										Fiber volley amplitude (%)
		5 Hz									10 Hz										20 Hz
		Stim #	E1-1	E2-2	E3-3	E4-4	E5-5	mean	sem		Stim #	E1-1	E2-2	E3-3	E4-4	E5-5	E6-6	mean	sem		Stim #	E1-1	E2-2	E3-3	E4-4	E5-5	E6-6	mean	sem
		1	100	100	100	100	100	100	0		1	100	100	100	100	100	100	100	0		1	100	100	100	100	100	100	100	0
		2	97.9359	110.009	97.9675	87.153	87.153	96.0437	4.245		2	90.6289	92.159	97.5192	126.214	89.5052	100.597	99.4372	5.63093		2	100.572	84.7679	105.983	135.817	97.3633	106.88	105.23	6.93098
		3	90.9755	100.303	97.6735	90.8688	90.8688	94.1379	2.02338		3	71.7611	98.9218	111.662	105.322	95.4944	114.921	99.6803	6.33832		3	98.3378	81.3924	109.893	121.191	92.4909	86.5955	98.3167	6.09644
		4	101.29	97.5157	111.761	90.2155	90.2155	98.1995	4.00888		4	80.9603	94.8705	115.338	105.408	80.4273	116.273	98.8795	6.56681		4	96.1039	86.3676	107.029	107.303	85.2595	101.287	97.2249	3.98535
		5	91.4024	101.508	103.454	80.0853	80.0853	91.307	5.01736		5	72.1863	100.113	107.435	112.362	102.223	101.384	99.2838	5.73147		5	104.629	85.5983	129.361	101.066	84.3128	96.4129	100.23	6.70992
		6	83.9514	100.162	117.16	85.8524	85.8524	94.5955	6.3494		6	47.1629	93.9628	112.698	122.192	94.1665	107.474	96.2761	10.7837		6	99.545	86.4287	131.203	111.052	85.9579	109.904	104.015	7.02066
		7	85.8106	95.2552	101.267	103.509	103.509	97.87	3.37189		7	48.5571	101.614	105.238	106.092	88.3958	101.931	91.9714	9.06488		7	95.5079	82.5065	115.734	108.801	97.676	101.044	100.212	4.68135
		8	91.0981	92.4586	90.6853	101.401	101.401	95.4088	2.46385		8	47.7781	92.2564	112.975	116.96	101.943	101.604	95.5861	10.2185		8	98.3378	78.5326	118.512	92.8456	84.54	116.336	98.1841	6.69231
		9	90.2454	96.5201	93.3676	99.1898	99.1898	95.7025	1.73527		9	59.1133	94.8064	114.306	100.684	82.6775	108.432	93.3365	8.18246		9	92.7419	81.7507	111.926	105.685	83.5975	90.5979	94.3832	4.9275
		10	88.2264	97.2393	111.718	91.6333	91.6333	96.0901	4.16604		10	62.9972	99.7385	107.608	122.575	85.1213	101.255	96.5492	8.34328		10	120.9	74.5504	117.422	111.035	92.986	109.051	104.324	7.13849
