# Supplementary material for: Distinct release properties of glutamate/GABA co-transmission serve as a frequency-dependent filtering of supramammillary inputs
Source: eLife. 2024 Dec 16;13:RP99711. doi: 10.7554/eLife.99711 (PMC11649240; doi:10.7554/eLife.99711)
Supplement: Figure 5—figure supplement 3—source data 1. [file elife-99711-fig5-figsupp3-data1.xlsx]

## Sheet: Fig. 5-S3A
	10 Hz	EPSCn/EPSC1
	Before	Stim #	E1-1	E2-2	E3-3	E4-4	E5-5	E6-6	E7-7	E8-8	mean	sem
		1	100	100	100	100	100	100	100	100	100	0
		2	27.1022	36.6413	35.5952	43.3786	31.8457	24.5838	34.6707	31.1091	33.1158	2.07415
		3	22.227	26.084	25	28.5178	19.6433	24.3527	26.2138	20.01	24.0061	1.1086
		4	19.99	21.1922	14.8083	29.0914	21.1251	22.171	17.0585	23.3181	21.0943	1.50647
		5	21.2867	27.5899	16.3714	20.6012	15.8157	19.6994	26.7919	17.8594	20.7519	1.56169
		6	25.2614	14.6356	13.7333	20.3238	16.2369	19.2077	18.2756	19.7556	18.4287	1.29495
		7	21.1721	15.5021	13.019	21.1146	18.3066	16.7891	18.3618	16.245	17.5638	0.982534
		8	21.7235	18.1252	12.6476	20.757	14.2512	15.1992	16.9984	16.4949	17.0246	1.09939
		9	18.8809	15.694	17.775	20.626	15.8543	14.1589	18.222	20.7588	17.7462	0.840313
		10	21.3222	15.3949	11.3333	14.0052	14.9952	13.6692	14.2089	17.0941	15.2529	1.04224
	gDGG	Stim #	E1-1	E2-2	E3-3	E4-4	E5-5	E6-6	E7-7	E8-8	mean	sem
		1	100	100	100	100	100	100	100	100	100	0
		2	37.4637	27.888	32.3377	39.2775	31.1021	44.9607	46.9164	37.5347	37.1851	2.34015
		3	23.2846	19.0812	20.7047	27.9847	24.4158	26.2252	40.2522	28.4712	26.3024	2.30792
		4	21.8174	17.8742	15.9639	19.0643	26.0128	35.6567	30.1211	24.396	23.8633	2.34763
		5	17.1648	17.2287	19.6897	19.9888	18.3013	26.0665	26.1176	23.5177	21.0094	1.31713
		6	20.7265	16.3337	20.7328	13.5912	17.0519	18.4823	34.0177	23.0786	20.5019	2.19794
		7	16.1449	16.2155	15.0504	28.0325	24.6377	20.3893	26.4875	21.0465	21.0005	1.76796
		8	13.6839	17.5649	12.2523	17.8111	17.7263	20.3619	20.4328	20.883	17.5895	1.12143
		9	14.1311	12.2904	16.5571	17.2528	14.0576	22.0511	24.1254	20.262	17.5909	1.48481
		10	14.754	15.8508	16.9181	21.3467	18.037	22.1642	23.4887	20.8095	19.1711	1.13323

## Sheet: Fig. 5-3B
	20 Hz	EPSCn/EPSC1
	Before	Stim #	E1-1	E2-2	E3-3	E4-4	E5-5	E6-6	E7-7	E8-8	mean	sem
		1	100	100	100	100	100	100	100	100	100	0
		2	23.3897	35.4845	36.2174	20.9439	30.1701	42.6671	19.5657	23.1081	28.9433	2.99514
		3	17.6593	22.6134	19.7055	15.9525	26.191	32.0539	13.5196	13.8403	20.192	2.28366
		4	18.905	24.8722	15.4829	17.4124	15.241	21.3629	11.373	10.2443	16.8617	1.7287
		5	20.5176	17.4085	14.9199	16.2138	15.4989	24.6819	11.8095	8.43766	16.186	1.76121
		6	15.0316	18.7478	15.5336	12.4145	11.5363	25.5369	11.1785	8.7659	14.8431	1.87708
		7	10.8963	20.7765	15.0044	15.2862	10.2739	22.9255	10.5974	6.19497	13.9944	2.00117
		8	13.1488	14.9565	16.6948	12.4814	8.91261	21.9086	9.20313	6.23645	12.9428	1.76259
		9	16.0622	15.6856	15.7996	8.31142	9.3966	24.7376	9.91683	6.12195	13.254	2.12747
		10	15.627	15.6672	15.1184	13.1665	9.90252	21.2722	10.0641	5.41113	13.2786	1.70159
	gDGG	Stim #	E1-1	E2-2	E3-3	E4-4	E5-5	E6-6	E7-7	E8-8	mean	sem
		1	100	100	100	100	100	100	100	100	100	0
		2	16.053	27.2057	33.1349	38.2028	41.1456	20.9799	11.8819	28.3573	27.1201	3.65875
		3	18.1842	25.5301	17.3938	29.0758	27.5652	17.8074	9.75596	14.2669	19.9474	2.40114
		4	13.156	21.7696	16.2741	19.5542	17.9364	14.7289	8.42761	11.744	15.4489	1.53806
		5	15.3868	32.2163	15.0406	14.9881	15.0093	15.6962	7.91249	11.0235	15.9092	2.523
		6	12.461	16.0285	12.9085	10.4852	14.6714	17.8819	8.86019	9.72055	12.8771	1.11957
		7	10.5851	21.1798	13.2506	8.77667	13.595	11.9925	7.5297	6.87093	11.7225	1.61711
		8	9.88183	17.2048	15.0421	8.7022	11.8596	12.4921	6.50637	5.3591	10.881	1.44069
		9	12.4202	21.5484	14.582	7.39286	19.1791	13.38	9.01387	5.82805	12.9181	1.95006
		10	15.2188	16.3209	11.9433	10.0957	13.7759	12.4461	8.09321	5.01135	11.6132	1.32908

## Sheet: Fig. 5-S3C
		IPSCn/IPSC1
	10 Hz
		Before
		Stim #	E1-1	E2-2	E3-3	E5-5	E6-6	E7-7	mean	sem
		1	100	100	100	100	100	100	100	0
		2	38.4316	31.8933	38.9236	40.293	34.7659	37.3035	36.9352	1.26136
		3	32.1868	28.0986	22.8515	20.3297	36.4146	31.6547	28.5893	2.48301
		4	26.845	20.6663	24.6093	23.8095	26.7951	26.6454	24.8951	0.99362
		5	27.3121	27.565	24.9022	23.6996	27.5854	28.777	26.6402	0.783866
		6	23.971	25.5146	22.9979	19.1758	25.2439	27.7112	24.1024	1.1808
		7	29.1962	35.2113	23.4374	21.7949	25.8537	30.6954	27.6981	2.03372
		8	29.3972	22.5352	19.3358	18.315	22.6829	28.777	23.5072	1.90128
		9	29.7025	18.6078	22.2655	27.5824	37.439	26.6454	27.0404	2.64308
		10	24.9478	24.377	25.4882	21.7582	31.2195	28.6171	26.068	1.367
		TPMPA
		Stim #	E1-1	E2-2	E3-3	E5-5	E6-6	E7-7	mean	sem
		1	100	100	100	100	100	100	100	0
		2	39.09	30.5335	30.634	30.7317	37.5362	33.206	33.6219	1.55149
		3	23.5714	29.5119	18.4022	25.7073	35.7971	32.5722	27.5937	2.58187
		4	23.5714	29.5119	17.5536	22.9756	32.8986	30.8481	26.2265	2.37701
		5	23.7571	28.8536	19.2023	25.0732	30.3623	21.8546	24.8505	1.71782
		6	29.8571	28.3768	18.4022	28.2927	26.2319	30.5685	26.9549	1.81626
		7	28.0714	26.924	18.9114	18.8	27.8261	34.576	25.8515	2.47644
		8	29.4	31.7821	16.7051	18.8878	24.2754	30.2889	25.2232	2.58018
		9	33.9286	34.9603	17.6021	18.1951	33.3333	27.8285	27.6413	3.24318
		10	24.6429	38.252	19.9782	25.7073	29.9275	26.6542	27.527	2.5177

## Sheet: Fig. 5-S3D
		IPSCn/IPSC1
	20 Hz
		Before
		Stim #	E1-1	E2-2	E3-3	E4-4	E5-5	mean	sem
		1	100	100	100	100	100	100	0
		2	31.2179	31.0899	55.8376	29.1246	30.5537	35.5647	5.08179
		3	17.4196	32.8793	64.9746	22.7	19.6484	31.5244	8.771
		4	21.5181	28.2244	61.9289	34.2642	20.4005	33.2672	7.58786
		5	15.357	32.4612	47.5127	29.6214	19.7424	28.9389	5.59867
		6	16.2556	31.4865	60.4061	32.037	17.4861	31.5343	7.95181
		7	13.3791	29.6028	48.3756	21.2438	18.5203	26.2243	6.12883
		8	17.8388	35.3574	37.0558	22.515	21.7166	26.8967	3.89146
		9	18.9538	30.7456	50.0508	21.5076	19.7424	28.2	5.85554
		10	12.7102	32.9746	53.8071	25.4823	16.5742	28.3097	7.28334
		TPMPA
		Stim #	E1-1	E2-2	E3-3	E4-4	E5-5	mean	sem
		1	100	100	100	100	100	100	0
		2	34.5241	44.7042	54.0541	27.2023	29.8552	38.068	4.98831
		3	29.0482	32.3741	47.6216	24.1473	23.9171	31.4217	4.34864
		4	27.5666	26.9784	55.5856	25.1099	27.8758	32.6233	5.76061
		5	22.7317	30.4413	52.2523	27.7464	21.278	30.8899	5.59186
		6	22.6147	31.3207	50.2703	26.2398	18.144	29.7179	5.57439
		7	19.4955	31.6225	43.4234	30.4248	21.1131	29.2158	4.2968
		8	15.2065	29.4518	47.7477	21.8874	22.5976	27.3782	5.56944
		9	16.9221	30.0118	41.8018	28.8763	18.8038	27.2832	4.47228
		10	13.8028	30.9245	55.6757	26.6164	18.144	29.0327	7.31361
