# Supplementary material for: Distinct release properties of glutamate/GABA co-transmission serve as a frequency-dependent filtering of supramammillary inputs
Source: eLife. 2024 Dec 16;13:RP99711. doi: 10.7554/eLife.99711 (PMC11649240; doi:10.7554/eLife.99711)
Supplement: Figure 5—source data 1. [file elife-99711-fig5-data1.xlsx]

## Sheet: Fig. 5B
		5Hz					10Hz					20Hz
		Stim #	EPSCn/EPSC1	sem			Stim #	EPSCn/EPSC1	sem			Stim #	EPSCn/EPSC1	sem
		1	100	0			1	100	0			1	100	0
		2	29.6439	2.71706			2	32.2545	2.64916			2	24.2282	3.60029
		3	25.9498	2.20303			3	22.746	2.04162			3	15.292	1.62112
		4	24.6792	1.5929			4	19.6751	1.53256			4	13.038	1.29788
		5	25.8514	2.5532			5	19.3816	1.61502			5	12.6585	1.36096
		6	25.8041	2.17315			6	19.0228	1.73763			6	12.7363	1.39659
		7	26.2648	2.45064			7	18.7783	1.49019			7	13.0778	1.2931
		8	26.3353	2.38645			8	19.4064	1.9815			8	12.9302	1.66419
		9	25.4463	2.50893			9	19.7883	1.67117			9	12.408	1.30722
		10	26.0954	2.81073			10	18.712	1.29279			10	12.773	1.40489
		EPSC
		2.5 Ca	5Hz
			1	2	3	4	5	6	7	8	9	10
			100	22.6227	22.3751	19.1444	17.7073	27.8812	31.8881	25.5532	28.0538	23.3622
			100	32.9212	21.2262	22.9212	23.0809	18.3926	22.8233	23.5961	17.1561	24.9356
			100	23.6812	25.6736	26.9455	22.4802	25.4981	21.5564	26.9178	20.6325	20.7249
			100	19.9386	20.7752	17.8472	19.9386	19.4716	19.047	20.1687	21.7199	18.3526
			100	25.0467	19.5043	20.3169	18.0415	19.9919	19.1792	14.807	16.7005	18.2251
			100	33.4534	28.8052	31.5581	30.8363	28.2774	29.9509	27.6399	30.6432	30.4599
			100	47.0155	41.2948	27.9924	40.4392	39.8202	41.5944	40.5299	39.9661	45.4187
			100	30.6494	26.5337	26.785	27.3495	25.149	22.5743	26.229	23.8298	23.851
			100	31.4667	27.3602	28.6023	32.7893	27.7549	27.7694	31.5762	30.3148	29.5286
			10Hz
			1	2	3	4	5	6	7	8	9	10
			100	26.7854	18.7266	16.5459	14.9823	15.5835	19.8879	13.0924	17.6875	14.8689
			100	45.0904	32.2817	25.5613	29.4608	29.6555	26.5365	32.8921	31.34	23.4453
			100	44.3513	29.6483	23.3299	25.5139	24.4448	15.5159	20.7829	20.7399	23.135
			100	29.7617	23.8437	18.7332	17.6028	15.3708	17.9326	21.7391	18.3239	21.0584
			100	24.0268	13.2529	14.1718	14.1609	13.3988	15.1448	13.5514	13.3155	11.5697
			100	27.1389	23.1705	19.4026	19.7029	16.0946	17.9626	17.1707	20.3762	19.7886
			100	22.2746	16.3859	14.1909	15.2019	15.0299	12.8782	12.636	15.1381	13.9595
			100	29.7259	23.3646	19.597	18.7081	18.9392	18.9601	21.8134	20.9259	19.2554
			100	41.4444	29.9972	28.7347	22.9639	25.3972	27.1278	24.2028	24.7708	22.2222
			100	31.9455	16.7883	16.4842	15.5191	16.3142	15.8364	16.1837	15.2648	17.8169
			20Hz
			1	2	3	4	5	6	7	8	9	10
			100	18.1829	12.4486	11.111	11.0397	10.0363	10.5692	10.989	9.66233	9.66096
			100	22.2814	15.4879	11.6568	10.5589	9.6287	11.8537	9.69636	8.9359	10.9419
			100	13.6641	8.17352	8.35154	6.76258	8.61225	8.80799	7.71628	7.47544	7.15404
			100	7.29759	7.6154	6.73904	5.75495	6.49291	6.03526	5.08018	7.29883	5.98657
			100	22.7423	15.8074	12.7289	12.501	12.4221	12.7478	12.9987	14.0553	13.1457
			100	19.3289	14.237	11.7588	11.9987	9.9442	13.3358	12.0342	13.559	12.0832
			100	25.8333	15.9933	16.0742	16.8183	16.615	13.805	13.1167	15.3775	15.7133
			100	28.1404	21.3965	15.2831	16.0811	17.9741	16.5068	15.0395	18.1758	18.0474
			100	39.0091	17.9473	20.8044	17.8641	17.286	19.6394	20.9304	18.4089	19.1151
			100	45.8022	23.8133	15.8727	17.2052	18.3519	17.4771	21.7011	11.1305	15.8822

## Sheet: Fig. 5C
		5Hz					10Hz					20Hz
		Stim #	EPSCn/EPSC1	sem			Stim #	EPSCn/EPSC1	sem			Stim #	EPSCn/EPSC1	sem
		1	100	0			1	100	0			1	100	0
		2	44.627	3.71312			2	42.8155	1.95851			2	36.2185	3.9009
		3	35.2743	2.31169			3	31.7908	1.78271			3	30.4526	4.10379
		4	36.5402	2.25113			4	30.5713	1.71123			4	24.8458	2.43164
		5	34.5962	2.33519			5	28.9362	2.28657			5	25.3858	3.27842
		6	36.5791	2.89798			6	28.9832	2.4038			6	25.9852	3.33165
		7	37.7388	3.39055			7	29.0664	1.63006			7	22.4121	2.5203
		8	37.8852	3.90945			8	27.5124	1.87169			8	22.4949	2.15329
		9	33.3448	2.18839			9	26.3788	1.25691			9	23.7018	3.03492
		10	34.8296	2.82163			10	26.8778	1.82206			10	21.2423	2.25622
		EPSC
		1 Ca	5 Hz
			1	2	3	4	5	6	7	8	9	10
			100	44.9909	33.9982	42.8944	36.5197	45.6709	54.3121	41.0245	34.2815	44.5376
			100	50.7192	41.8514	41.2026	49.097	37.0931	32.443	38.6071	30.8208	28.5498
			100	26.6632	23.298	23.9969	24.5405	19.0525	25.0065	22.6508	20.2174	20.1916
			100	37.0548	30.0077	31.3818	29.0601	29.2718	28.6779	27.4808	28.2704	28.0051
			100	38.6905	36.5758	31.5394	34.585	32.5599	30.0891	30.7747	32.8473	33.902
			100	44.1989	45.0066	41.5921	31.2024	42.1305	35.9694	35.8441	42.3559	35.4184
			100	65.2305	29.0772	43.9297	31.6429	38.972	51.8259	64.0135	40.3344	38.4846
			100	54.25	40.9061	38.75	39.7444	46.9528	42	40.9111	35.4944	47.4722
			100	39.8449	36.7479	33.5749	34.9739	37.5082	39.3254	39.6599	35.4808	36.9051
			10Hz
			1	2	3	4	5	6	7	8	9	10
			100	40.1003	28.0488	26.6667	28.0312	28.0718	23	22.378	23.6192	22.0298
			100	44.1269	33.0213	36.6147	23.5798	28.3038	30.5665	31.1619	29.3756	29.1374
			100	41.8043	36.0794	32.4991	23.6462	28.2834	32.2381	30.7374	29.4857	25.513
			100	40.8056	30.5649	32.5383	32.0935	25.5925	34.4388	26.9688	28.3344	22.3552
			100	34.9692	26.4507	23.7172	20.1432	20.3591	21.7947	18.5618	21.0114	21.2943
			100	45.7565	34.0341	30.2512	33.5148	32.9205	26.5085	27.7405	25.1103	28.4369
			100	36.7652	21.652	21.2279	20.8953	15.908	22.5825	20.4663	19.0914	21.4706
			100	41.7703	30.0348	30.1026	28.9476	30.3693	32.2635	30.8463	29.8427	25.8736
			100	44.3855	37.1498	33.8548	42.943	39.3999	35.6009	27.6161	27.6793	37.945
			100	57.671	40.872	38.2403	35.5672	40.6235	31.6705	38.6469	30.2383	34.722
			20Hz
			1	2	3	4	5	6	7	8	9	10
			100	28.2949	22.1969	20.8163	20.7185	20.2272	18.9035	17.6877	20.9073	16.7563
			100	37.3977	30.9248	21.8466	18.0403	21.6389	18.1343	19.5827	14.4357	14.8782
			100	29.4743	22.3529	20.0974	17.823	24.8658	17.4145	20.0662	17.4908	16.875
			100	14.7787	12.4674	12.0326	9.17625	9.63946	8.62069	8.40996	9.21628	8.3908
			100	42.9497	31.6936	30.6836	30.1451	24.6714	25.2358	25.3612	30.0655	23.6862
			100	40.751	31.7082	29.5473	38.4556	33.9022	29.3841	28.2706	30.2088	23.3137
			100	34.3839	26.2283	21.4451	23.8886	24.9675	21.3318	21.3306	17.3372	23.9748
			100	37.8573	28.5675	29.0404	26.0172	16.9082	19.0805	22.7285	24.1787	25.5396
			100	33.2549	36.3229	22.902	24.8366	36.6013	28.9765	29.7647	32.6405	25
			100	63.0424	62.0639	40.047	44.7566	46.4296	37.0389	31.7465	40.5368	34.0082

## Sheet: Fig. 5E
		5Hz					10Hz					20Hz
		Stim #	IPSCn/IPSC1	sem			Stim #	IPSCn/IPSC1	sem			Stim #	IPSCn/IPSC1	sem
		1	100	0			1	100	0			1	100	0
		2	34.0285	1.81401			2	36.3625	2.6171			2	38.0711	2.09778
		3	26.3312	1.62516			3	30.2382	3.68854			3	28.4538	1.91086
		4	28.5117	1.37642			4	25.5435	2.43589			4	24.0357	2.34496
		5	27.2227	1.94444			5	24.3954	1.88016			5	23.1102	1.55291
		6	24.7039	1.81469			6	24.3911	1.63325			6	21.5617	1.64162
		7	25.7747	1.67084			7	26.8192	2.82357			7	22.3157	2.19907
		8	25.7477	1.91401			8	23.3676	1.90915			8	21.3342	1.35059
		9	25.6435	2.02576			9	25.5664	2.6749			9	22.3247	1.5637
		10	24.9214	1.97275			10	24.7609	2.83027			10	21.4828	1.40201
		IPSC
		2.5 Ca	5Hz
			1	2	3	4	5	6	7	8	9	10
			100	37.8302	30.096	32.4079	38.1287	30.8337	34.4675	29.93	34.0934	31.5252
			100	25.7835	21.3149	28.5727	21.1221	18.3801	19.5893	20.8222	18.9028	21.0364
			100	34.3527	21.6077	30.1768	22.8114	21.5657	21.7761	23.2744	20.4461	24.5791
			100	35.4771	24.8534	21.8012	28.7449	30.5217	25.4573	21.605	23.1812	19.0543
			100	42.895	33.7523	32.9895	27.5003	29.6648	28.0006	32.3494	34.5973	34.3165
			100	29.2993	22.8207	23.9671	20.5641	18.8289	20.1661	17.926	20.8816	19.8717
			100	31.8634	24.9175	30.5184	26.7017	23.5005	25.2997	28.5058	23.0216	23.3268
			100	29.5623	24.0839	24.3224	25.4042	19.2665	25.5748	22.7669	24.2115	19.3592
			100	39.1933	33.5343	31.849	34.0268	29.7736	31.641	34.5501	31.4557	31.2233
			10Hz
			1	2	3	4	5	6	7	8	9	10
			100	44.7941	46.4203	40.6208	27.4393	27.978	41.1842	30.7371	41.5869	33.6321
			100	45.3387	49.9828	32.6909	32.9627	30.7817	36.0527	31.2443	31.995	42.0723
			100	41.6417	32.776	25.4132	29.5122	26.6058	32.7777	27.0974	25.4986	26.6947
			100	30.1256	23.0769	19.0444	23.759	24.9851	25.641	19.5179	22.1282	20.9744
			100	28.5223	17.552	17.4602	16.5087	16.3488	15.1046	17.3768	15.4146	16.6338
			100	43.0301	25.7889	26.908	27.1151	27.5629	26.1476	27.5538	29.4524	26.3324
			100	34.6814	27.8898	25.2296	25.26	22.9175	25.2426	19.2497	25.408	20.6087
			100	23.501	21.6778	20.1235	16.8524	16.9608	18.7615	17.2461	17.2083	18.8863
			100	35.6278	26.9792	22.4011	20.1495	25.3789	20.4611	20.2848	21.4057	17.0137
			20Hz
			1	2	3	4	5	6	7	8	9	10
			100	27.5574	26.4517	22.5752	19.2752	19.3017	19.7307	24.7901	23.9992	16.8342
			100	42.0033	28.0194	35.5627	27.2948	28.3688	29.7723	25.5449	28.7667	24.4634
			100	53.2618	54.5114	33.1754	52.7099	34.6134	45.0502	35.7849	41.4177	34.1131
			100	40.7686	37.0352	29.74	26.5004	27.5603	32.0582	22.9564	23.327	18.0769
			100	38.7305	26.723	20.3956	21.6243	20.8987	25.0211	20.7797	23.1601	28.0064
			100	43.9567	29.6381	29.1276	27.4549	23.5905	20.9661	22.2203	16.3911	19.8812
			100	33.1741	20.2752	17.6318	19.4528	14.8347	20.5915	14.2337	26.4748	22.1414
			100	44.2688	34.8442	17.709	26.7653	18.6206	15.3179	22.8275	19.8386	24.5685
			100	34.1094	24.6438	19.5437	16.5137	19.3184	15.0679	17.3211	16.6405	17.8905

## Sheet: Fig. 5F
		5Hz					10Hz					20Hz
		Stim #	IPSCn/IPSC1	sem			Stim #	IPSCn/IPSC1	sem			Stim #	IPSCn/IPSC1	sem
		1	100	0			1	100	0			1	100	0
		2	60.5076	2.67316			2	63.8236	7.24973			2	54.7401	3.69443
		3	51.3329	2.0497			3	50.6547	7.39144			3	47.0478	3.74983
		4	45.365	2.85119			4	49.3073	7.66047			4	48.0879	2.83323
		5	41.8674	2.42359			5	47.7697	5.47199			5	43.4862	3.42012
		6	48.7637	1.7299			6	47.7405	6.59345			6	43.9631	3.03409
		7	47.9085	2.9192			7	47.962	6.58931			7	40.5233	2.29654
		8	44.6455	1.97485			8	44.749	6.01654			8	42.8409	5.29741
		9	49.0127	2.98458			9	48.0031	6.57997			9	42.6968	2.03956
		10	45.7991	2.64182			10	46.7061	6.28558			10	42.7629	2.42212
		IPSC
		1 Ca	5Hz
			1	2	3	4	5	6	7	8	9	10
			100	62.5954	43.7782	47.2363	36.4205	55.9689	51.9038	39.874	52.8143	50.584
			100	55.5099	48.4812	51.6304	50.3575	51.2196	49.5968	43.6128	59.9219	54.1356
			100	68.8749	48.2199	52.426	41.7606	46.4924	47.1684	44.7649	56.1064	49.1212
			100	69.4443	41.2625	46.0854	34.9392	46.2719	44.7709	50.7475	59.3966	42.704
			100	54.6199	56.8296	50.8658	50.9193	44.1265	54.055	54.7102	47.9943	53.1056
			100	49.15	54.4103	27.6288	29.523	39.7134	34.8804	35.7634	34.9527	31.5307
			100	71.6923	59.0481	50.9572	47.4517	53.9647	57.5371	47.7703	39.4935	42.4379
			100	53.9118	55.3861	34.6836	40.9569	52.7084	33.932	39.2332	41.2424	36.6494
			100	58.7696	54.58	46.7711	44.478	48.4072	57.3317	45.3332	49.1922	51.9233
			10Hz
			1	2	3	4	5	6	7	8	9	10
			100	92.508	98.089	99.3912	78.4712	74.2432	85.5978	84.5594	76.6109	85.405
			100	100.961	72.4954	70.0645	68.3556	82.2275	70.1457	56.6754	83.1888	68.3556
			100	63.7001	40.723	39.3382	39.9372	37.9965	40.5363	40.2716	38.8622	39.6541
			100	50.5206	29.964	34.0455	35.2499	31.5784	29.5678	29.8757	33.0049	37.1629
			100	45.4836	41.5559	41.0718	40.4735	35.6537	44.1053	30.8001	35.6685	31.1109
			100	74.7568	51.1494	55.5187	47.3981	55.5324	55.6806	44.3701	54.3567	51.7226
			100	55.1424	46.6286	41.4546	45.0028	40.6465	44.1253	38.6862	44.0716	40.5202
			100	35.305	26.6433	22.865	25.2667	22.7717	22.115	25.8183	25.9867	27.4383
			100	56.0349	48.644	40.0158	49.772	49.015	39.7848	51.6843	40.2773	38.9852
			20Hz
			1	2	3	4	5	6	7	8	9	10
			100	59.6347	46.8164	56.7752	43.5603	38.3216	39.6523	31.6204	40.3233	48.7532
			100	45.2869	37.8441	43.0023	50.7645	49.097	41.9493	44.6069	48.1949	52.7612
			100	89.3067	88.4841	84.9083	53.9812	86.4865	72.7991	91.0928	81.517	82.0329
			100	61.8519	39.7751	57.22	60.1873	44.5379	48.1566	75.1576	46.8399	46.5574
			100	39.2452	45.8893	47.638	38.6283	42.0376	36.0388	31.5282	41.4816	43.1936
			100	57.4896	70.4909	51.8529	48.6326	53.9468	52.0453	45.1139	51.0175	43.3469
			100	49.2727	40.716	32.3294	29.8095	29.3997	34.9314	49.0678	35.6484	35.0953
			100	52.5624	42.018	46.9307	41.9692	54.954	37.0753	29.266	34.9906	32.1504
			100	72.5769	52.8328	48.9543	34.3374	39.41	34.3374	36.3665	43.0779	40.245

## Sheet: Fig. 5G
				Ca2+
				2.5 mM
					EPSC	sem	IPSC	sem
				5Hz	26.0954	2.81073	24.9214	1.97275
				10 Hz	18.712	1.29279	24.7609	2.83027
				20 Hz	12.773	1.40489	21.4828	1.40201
				Ca2+
				1 mM
					EPSC	sem	IPSC	sem
				5Hz	34.8296	2.82163	45.7991	2.64182
				10 Hz	26.8778	1.82206	46.7061	6.28558
				20 Hz	21.2423	2.25622	42.7629	2.42212
