# Supplementary material for: Distinct release properties of glutamate/GABA co-transmission serve as a frequency-dependent filtering of supramammillary inputs
Source: eLife. 2024 Dec 16;13:RP99711. doi: 10.7554/eLife.99711 (PMC11649240; doi:10.7554/eLife.99711)
Supplement: Figure 6—source data 1. [file elife-99711-fig6-data1.xlsx]

## Sheet: Fig. 6A
	Spike probability (%)
	Control
	Stim#	E1-1	E2-2	E3-3	E4-4	E5-5	E6-6	E7-7	E8-8	E9-9	E10-10	E11-11	E12-12	E13-13	E14-14	mean	sem
	1	0	20	0	30	10	0	0	20	50	60	0	90	0	90	26.4286	8.87069
	2	10	90	50	40	60	10	0	30	70	90	20	70	0	80	44.2857	8.81521
	3	30	90	80	40	90	30	10	40	30	90	30	40	10	50	47.1429	7.66242
	4	60	50	90	40	20	30	10	60	40	20	40	40	50	20	40.7143	5.5928
	5	30	40	40	0	30	20	40	40	0	0	10	0	10	10	19.2857	4.50449
	6	40	10	50	20	0	20	20	10	10	20	20	0	30	30	20	3.77964
	7	30	10	20	0	20	10	30	30	0	10	10	0	0	30	14.2857	3.26727
	8	20	50	40	20	20	10	50	20	10	10	0	10	0	0	18.5714	4.55216
	9	10	0	20	20	10	30	30	20	0	0	60	10	0	20	16.4286	4.39869
	10	10	20	30	20	0	40	60	20	0	0	20	0	0	0	15.7143	4.88486
	light
	Stim#	E1-1	E2-2	E3-3	E4-4	E5-5	E6-6	E7-7	E8-8	E9-9	E10-10	E11-11	E12-12	E13-13	E14-14	mean	sem
	1	20	50	60	50	40	40	0	40	40	80	80	70	30	30	45	5.99908
	2	60	100	90	100	60	70	50	100	100	80	90	90	40	30	75.7143	6.43772
	3	90	100	100	60	40	80	40	100	80	50	80	70	60	10	68.5714	7.17575
	4	80	100	100	10	50	70	60	90	30	20	60	10	60	20	54.2857	8.56227
	5	90	80	90	10	50	80	50	40	20	0	70	30	30	10	46.4286	8.3605
	6	70	60	80	20	40	80	70	40	0	0	20	10	10	10	36.4286	8.09335
	7	70	30	80	10	0	70	40	50	10	0	50	30	0	20	32.8571	7.44419
	8	70	70	50	50	30	50	70	50	30	20	30	10	0	20	39.2857	6.06415
	9	70	40	80	10	20	40	60	40	30	10	20	20	0	10	32.1429	6.47723
	10	60	30	40	30	20	60	40	50	0	40	40	10	10	20	32.1429	4.93681
	PTX
	Stim#	E1-1	E2-2	E3-3	E4-4	E5-5	E6-6	E7-7	E8-8	E9-9	E10-10	E11-11	E12-12	E13-13	E14-14	mean	sem
	1	50	100	100	100	100	40	10	100	100	100	100	100	80	90	83.5714	7.74647
	2	90	100	100	80	80	60	60	80	100	100	90	100	100	90	87.8571	3.80552
	3	100	100	100	60	50	80	80	80	80	50	70	100	100	100	82.1429	5.04688
	4	100	100	100	40	70	80	60	70	40	60	70	80	70	100	74.2857	5.51863
	5	90	100	100	20	40	90	90	80	40	40	50	40	40	70	63.5714	7.38332
	6	90	90	100	20	50	100	60	70	60	70	40	30	70	60	65	6.60918
	7	90	100	100	20	40	90	80	70	10	20	70	30	60	30	57.8571	8.59201
	8	60	70	100	10	20	70	80	60	20	60	30	40	20	70	50.7143	7.29777
	9	80	70	100	20	20	80	100	60	40	50	40	30	20	20	52.1429	7.92676
	10	70	50	100	50	10	80	90	50	20	60	60	20	20	70	53.5714	7.45736

## Sheet: Fig. 6B
	Spike probability (%)
	Control
	Stim#	E1-1	E2-2	E3-3	E4-4	E5-5	E6-6	E7-7	E8-8	E9-9	E10-10	E11-11	E12-12	E13-13	mean	sem
	1	100	10	40	10	0	60	10	80	40	20	50	0	30	34.6154	8.66879
	2	40	60	70	30	10	80	10	70	40	90	20	10	30	43.0769	7.7942
	3	20	20	40	20	10	60	0	70	10	20	40	10	30	26.9231	5.70477
	4	0	20	60	30	20	50	0	90	50	30	40	20	40	34.6154	6.85148
	5	20	10	50	20	0	30	20	30	20	0	40	50	0	22.3077	4.82433
	6	20	0	40	60	10	20	10	10	20	10	30	40	0	20.7692	4.86504
	7	10	0	50	10	30	10	30	30	10	10	0	40	0	17.6923	4.55083
	8	0	0	50	20	20	10	20	10	10	0	10	30	0	13.8462	4.00936
	9	0	0	30	20	10	10	10	30	0	30	30	40	10	16.9231	3.82043
	10	0	0	40	0	10	10	10	10	10	10	0	30	30	12.3077	3.60801
	light
	Stim#	E1-1	E2-2	E3-3	E4-4	E5-5	E6-6	E7-7	E8-8	E9-9	E10-10	E11-11	E12-12	E13-13	mean	sem
	1	100	30	100	100	100	100	60	100	90	100	70	0	70	78.4615	8.90449
	2	20	0	70	100	100	100	20	100	60	70	50	50	70	62.3077	9.34755
	3	20	0	40	90	80	100	20	80	30	60	40	60	40	50.7692	8.43235
	4	20	0	30	80	80	70	50	70	40	10	40	50	10	42.3077	7.60852
	5	20	0	50	40	60	50	30	30	30	20	40	80	20	36.1538	5.72203
	6	10	0	20	20	60	40	20	30	10	10	20	80	20	26.1538	6.15385
	7	0	10	40	10	40	30	20	0	20	30	30	60	20	23.8462	4.74186
	8	0	30	40	10	10	30	10	30	20	0	20	50	0	19.2308	4.45224
	9	0	0	50	10	10	10	50	30	20	30	20	50	10	22.3077	5.08314
	10	0	0	50	10	60	20	10	20	0	10	20	50	20	20.7692	5.60008
	PTX
	Stim#	E1-1	E2-2	E3-3	E4-4	E5-5	E6-6	E7-7	E8-8	E9-9	E10-10	E11-11	E12-12	E13-13	mean	sem
	1	100	100	100	100	100	100	80	100	100	100	100	40	100	93.8462	4.74186
	2	90	40	80	100	100	100	50	100	70	80	80	70	100	81.5385	5.52919
	3	40	20	80	100	100	100	40	80	50	70	30	80	100	68.4615	8.07387
	4	0	30	80	100	100	100	60	80	90	10	80	80	80	68.4615	9.39491
	5	0	20	70	70	90	90	40	60	60	20	20	80	30	50	8.3205
	6	0	10	80	50	60	50	70	60	40	0	60	80	30	45.3846	7.73067
	7	0	20	70	20	30	60	50	40	10	30	40	70	30	36.1538	6.04878
	8	0	10	80	30	50	20	50	0	40	20	20	90	30	33.8462	7.72429
	9	10	0	60	10	10	40	60	70	10	10	30	50	40	30.7692	6.64691
	10	40	30	70	30	30	40	40	20	20	40	20	60	50	37.6923	4.25981

## Sheet: Fig. 6C
	Spike probability (%)
	Control
	Stim#	E1-1	E2-2	E3-3	E4-4	E5-5	E6-6	E7-7	E8-8	E9-9	E10-10	E11-11	mean	sem
	1	40	80	40	40	70	20	20	100	50	90	70	56.3636	8.23217
	2	0	20	10	20	10	20	10	40	40	10	10	17.2727	3.83546
	3	0	30	30	30	20	20	30	50	30	20	30	26.3636	3.63636
	4	0	10	10	10	0	10	20	40	50	20	40	19.0909	5.1265
	5	0	40	30	20	0	10	20	30	10	10	20	17.2727	3.83546
	6	0	20	20	20	0	0	30	40	50	30	0	19.0909	5.30087
	7	0	20	0	0	20	0	10	30	0	20	10	10	3.30289
	8	0	10	0	20	0	0	10	10	30	10	20	10	3.01511
	9	0	0	0	0	0	10	10	20	20	20	10	8.18182	2.6348
	10	0	10	10	20	0	0	10	10	0	0	20	7.27273	2.37062
	light
	Stim#	E1-1	E2-2	E3-3	E4-4	E5-5	E6-6	E7-7	E8-8	E9-9	E10-10	E11-11	mean	sem
	1	100	100	90	70	100	100	60	100	70	100	100	90	4.67099
	2	50	50	40	30	20	50	0	70	30	80	80	45.4545	7.55148
	3	30	30	30	30	40	30	40	80	20	100	70	45.4545	7.78853
	4	10	40	10	20	20	10	30	40	50	70	10	28.1818	6.00275
	5	30	50	10	10	20	0	30	50	50	50	30	30	5.55959
	6	0	50	0	40	40	10	20	30	30	10	10	21.8182	5.19058
	7	0	30	20	0	0	0	10	20	10	0	10	9.09091	3.14918
	8	0	20	10	10	10	0	30	10	0	20	10	10.9091	2.8459
	9	10	20	0	0	10	0	20	10	20	20	10	10.9091	2.50619
	10	0	40	0	0	20	0	30	10	0	10	0	10	4.26401
	PTX
	Stim#	E1-1	E2-2	E3-3	E4-4	E5-5	E6-6	E7-7	E8-8	E9-9	E10-10	E11-11	mean	sem
	1	100	100	100	100	100	100	100	100	100	100	100	100	0
	2	80	100	100	90	30	100	60	100	80	80	80	81.8182	6.44109
	3	50	70	90	40	50	100	50	100	60	60	100	70	7.00649
	4	20	20	70	30	40	70	60	100	40	60	60	51.8182	7.36308
	5	30	40	40	10	40	40	40	90	50	60	80	47.2727	6.75425
	6	30	30	30	30	30	10	40	60	30	30	30	31.8182	3.52089
	7	20	30	10	20	20	0	50	50	20	50	40	28.1818	5.19058
	8	10	20	20	0	50	0	10	50	20	20	40	21.8182	5.36287
	9	0	30	40	0	0	0	20	30	30	40	20	19.0909	4.94599
	10	0	50	0	40	20	10	30	10	0	40	50	22.7273	6.04392

## Sheet: Fig. 6D
				Spike probability (%)
				#1-3	sem	#8-10	sem
			Control	39.2857	4.97838	16.9048	2.60635
			Light	63.0952	4.22217	34.5238	3.34265
			PTX	84.5238	3.27242	52.1429	4.26388
		Spike probability (%)
			Control				Light				PTX
		Stim #	#1	#2	#3		#1	#2	#3		#1	#2	#3
			0	10	30		20	60	90		50	90	100
			20	90	90		50	100	100		100	100	100
			0	50	80		60	90	100		100	100	100
			30	40	40		50	100	60		100	80	60
			10	60	90		40	60	40		100	80	50
			0	10	30		40	70	80		40	60	80
			0	0	10		0	50	40		10	60	80
			20	30	40		40	100	100		100	80	80
			50	70	30		40	100	80		100	100	80
			60	90	90		80	80	50		100	100	50
			0	20	30		80	90	80		100	90	70
			90	70	40		70	90	70		100	100	100
			0	0	10		30	40	60		80	100	100
			90	80	50		30	30	10		90	90	100
				total mean	39.2857			total mean	63.0952			total mean	84.5238
				sem	4.97838			sem	4.22217			sem	3.27242
			Control				Light				PTX
		Stim #	#8	#9	#10		#8	#9	#10		#8	#9	#10
			20	10	10		70	70	60		60	80	70
			50	0	20		70	40	30		70	70	50
			40	20	30		50	80	40		100	100	100
			20	20	20		50	10	30		10	20	50
			20	10	0		30	20	20		20	20	10
			10	30	40		50	40	60		70	80	80
			50	30	60		70	60	40		80	100	90
			20	20	20		50	40	50		60	60	50
			10	0	0		30	30	0		20	40	20
			10	0	0		20	10	40		60	50	60
			0	60	20		30	20	40		30	40	60
			10	10	0		10	20	10		40	30	20
			0	0	0		0	0	10		20	20	20
			0	20	0		20	10	20		70	20	70
				total mean	16.9048			total mean	34.5238			total mean	52.1429
				sem	2.60635			sem	3.34265			sem	4.26388

## Sheet: Fig. 6E
				Spike probability (%)
				#1-3	sem	#8-10	sem
			Control	34.8718	4.34466	14.359	2.16695
			Light	63.8462	5.33133	20.7692	2.85466
			PTX	81.282	3.90818	34.1026	3.6128
		Spike probability (%)
			Control				Light				PTX
		Stim #	#1	#2	#3		#1	#2	#3		#1	#2	#3
			100	40	20		100	20	20		100	90	40
			10	60	20		30	0	0		100	40	20
			40	70	40		100	70	40		100	80	80
			10	30	20		100	100	90		100	100	100
			0	10	10		100	100	80		100	100	100
			60	80	60		100	100	100		100	100	100
			10	10	0		60	20	20		80	50	40
			80	70	70		100	100	80		100	100	80
			40	40	10		90	60	30		100	70	50
			20	90	20		100	70	60		100	80	70
			50	20	40		70	50	40		100	80	30
			0	10	10		0	50	60		40	70	80
			30	30	30		70	70	40		100	100	100
				total mean	34.8718			total mean	63.8462			total mean	81.2821
				sem	4.34466			sem	5.33133			sem	3.90818
			Control				Light				PTX
		Stim #	#8	#9	#10		#8	#9	#10		#8	#9	#10
			0	0	0		0	0	0		0	10	40
			0	0	0		30	0	0		10	0	30
			50	30	40		40	50	50		80	60	70
			20	20	0		10	10	10		30	10	30
			20	10	10		10	10	60		50	10	30
			10	10	10		30	10	20		20	40	40
			20	10	10		10	50	10		50	60	40
			10	30	10		30	30	20		0	70	20
			10	0	10		20	20	0		40	10	20
			0	30	10		0	30	10		20	10	40
			10	30	0		20	20	20		20	30	20
			30	40	30		50	50	50		90	50	60
			0	10	30		0	10	20		30	40	50
				total mean	14.359			total mean	20.7692			total mean	34.1026
				sem	2.16695			sem	2.85466			sem	3.6128

## Sheet: Fig. 6F
				Spike probability (%)
				#1-3	sem	#8-10	sem
			Control	33.3333	4.32283	8.48485	1.51515
			Light	60.303	5.32086	10.6061	1.84326
			PTX	83.9394	3.76737	21.2121	3.06982
		Spike probability (%)
			Control				Light				PTX
		Stim #	#1	#2	#3		#1	#2	#3		#1	#2	#3
			40	0	0		100	50	30		100	80	50
			80	20	30		100	50	30		100	100	70
			40	10	30		90	40	30		100	100	90
			40	20	30		70	30	30		100	90	40
			70	10	20		100	20	40		100	30	50
			20	20	20		100	50	30		100	100	100
			20	10	30		60	0	40		100	60	50
			100	40	50		100	70	80		100	100	100
			50	40	30		70	30	20		100	80	60
			90	10	20		100	80	100		100	80	60
			70	10	30		100	80	70		100	80	100
				total mean	33.3333			total mean	60.303			total mean	83.9394
				sem	4.32283			sem	5.32086			sem	3.76737
			Control				Light				PTX
			#8	#9	#10		#8	#9	#10		#8	#9	#10
			0	0	0		0	10	0		10	0	0
		Stim #	10	0	10		20	20	40		20	30	50
			0	0	10		10	0	0		20	40	0
			20	0	20		10	0	0		0	0	40
			0	0	0		10	10	20		50	0	20
			0	10	0		0	0	0		0	0	10
			10	10	10		30	20	30		10	20	30
			10	20	10		10	10	10		50	30	10
			30	20	0		0	20	0		20	30	0
			10	20	0		20	20	10		20	40	40
			20	10	20		10	10	0		40	20	50
				total mean	8.48485			total mean	10.6061			total mean	21.2121
				sem	1.51515			sem	1.84326			sem	3.06982
